# Supplementary material for: Women's empowerment and child nutrition: The role of intrinsic agency
Source: PubMed Central journal article supplement (PMC6978483; doi:10.1016/j.ssmph.2019.100475), 2019-11-20
Supplement: mmc1.pdf [file mmc1.pdf]

## Appendix

*Supplemental Table 1. Instrument Detail for all components of Path Analysis*

| Domain                               | Survey Question                                                                                                                                                                                                                                                                         | Measurement Scale                       |
|--------------------------------------|-----------------------------------------------------------------------------------------------------------------------------------------------------------------------------------------------------------------------------------------------------------------------------------------|-----------------------------------------|
| <b>Child Nutritional Status</b>      |                                                                                                                                                                                                                                                                                         |                                         |
| Height for Age Z score               | Standing height (> 24 mo) or recumbent length (<24 mo) measured using wooden stadiometer                                                                                                                                                                                                | Continuous (WHO Child Growth Standards) |
| Weight for Age Z score               | Weight measured using mother-baby electronic scales                                                                                                                                                                                                                                     | Continuous (WHO Child Growth Standards) |
| Anemia Status                        | Altitude-adjusted hemoglobin with HemoCue Photometer                                                                                                                                                                                                                                    | Dichotomous (Anemic: < 11.0 g/dL)       |
| <b>Women's Empowerment</b>           |                                                                                                                                                                                                                                                                                         |                                         |
| Latent Factor: Human & Social Assets | How old were you when you had sexual intercourse for the very first time?                                                                                                                                                                                                               | Continuous (years)                      |
|                                      | How old were you when you first started living with [current or former partner]?                                                                                                                                                                                                        | Continuous (years)                      |
|                                      | In what month and year was [CHILD] born? (PROBE: What is his/her birthday?)                                                                                                                                                                                                             | Continuous (Month/Year)                 |
| Latent Factor: Intrinsic Agency      | In your opinion, is a husband justified in hitting or beating his wife in the following situations?<br><br>- If she goes out without telling him?<br>- If she neglects the children?<br>- If she argues with him?<br>- If she refuses to have sex with him?<br>- If she burns the food? | Dichotomous (Yes/ No / DK)              |

|                                    |                                                                       |                                                                                                                          |
|------------------------------------|-----------------------------------------------------------------------|--------------------------------------------------------------------------------------------------------------------------|
| Latent Factor: Instrumental Agency | Who usually decides how the money you earn will be used?              | Dichotomous (Mainly you, Mainly your husband/partner, you and your husband/partner jointly / no involvement in decision) |
|                                    | Who usually makes decisions about health care for yourself?           |                                                                                                                          |
|                                    | Who usually makes decisions about making major household purchases?   |                                                                                                                          |
|                                    | Who usually makes decisions about visits to your family or relatives? |                                                                                                                          |
| <b>Mediator</b>                    |                                                                       |                                                                                                                          |
| Women's BMI                        | Directly measured height and weight                                   | Continuous (Body Mass Index (kg/m <sup>2</sup> ))                                                                        |

<sup>a</sup> Adapted from Table 6 of Miedema, S. S., Haardörfer, R., Girard, A. W., & Yount, K. M. (2018). Women's Empowerment in East Africa: Development of a cross-country comparable measure. *World Development*, 110, 453-464. doi:10.1016/j.worlddev.2018.05.031

*Supplemental Table 2. Selected Characteristics of east African women and children sampled by Demographic Health Surveys (2011-2016) stratified by country (n=13,780)*

| Variable                                  | Ethiopia 2011<br>(n=2664) |      | Kenya 2014<br>(n=4918) |      | Rwanda 2014-15<br>(n=1925) |      | Tanzania 2015-16<br>(n=2490) |      | Uganda 2011<br>(n=1783) |      |
|-------------------------------------------|---------------------------|------|------------------------|------|----------------------------|------|------------------------------|------|-------------------------|------|
|                                           | Mean / %                  | SD   | Mean / %               | SD   | Mean / %                   | SD   | Mean / %                     | SD   | Mean / %                | SD   |
| <b>Domain: Human/Social Assets</b>        |                           |      |                        |      |                            |      |                              |      |                         |      |
| Age at first sex                          | 16.6                      | 3.45 | 17.0                   | 3.27 | 20.5                       | 3.62 | 16.9                         | 2.78 | 16.5                    | 2.73 |
| Age at first cohabitation                 | 16.8                      | 3.68 | 18.7                   | 3.83 | 21.3                       | 3.61 | 18.6                         | 3.57 | 17.7                    | 3.43 |
| Age at first birth                        | 19.0                      | 3.68 | 19.4                   | 3.61 | 22.0                       | 3.65 | 19.4                         | 3.35 | 18.5                    | 3.24 |
| <b>Domain: Intrinsic Agency</b>           |                           |      |                        |      |                            |      |                              |      |                         |      |
| Goes out without spouse                   | 50%                       |      | 69%                    |      | 79%                        |      | 56%                          |      | 63%                     |      |
| if neglects child                         | 43%                       |      | 56%                    |      | 72%                        |      | 50%                          |      | 52%                     |      |
| if argues with husband                    | 47%                       |      | 71%                    |      | 80%                        |      | 56%                          |      | 70%                     |      |
| if refuses sex                            | 53%                       |      | 77%                    |      | 75%                        |      | 67%                          |      | 77%                     |      |
| if burns food                             | 49%                       |      | 89%                    |      | 92%                        |      | 79%                          |      | 84%                     |      |
| <b>Domain: Instrumental Agency</b>        |                           |      |                        |      |                            |      |                              |      |                         |      |
| for respondent's earnings                 | 89%                       |      | 89%                    |      | 87%                        |      | 89%                          |      | 83%                     |      |
| for respondent's health                   | 72%                       |      | 72%                    |      | 85%                        |      | 71%                          |      | 64%                     |      |
| for large purchases                       | 64%                       |      | 65%                    |      | 73%                        |      | 41%                          |      | 60%                     |      |
| for family/friends visits                 | 74%                       |      | 67%                    |      | 85%                        |      | 58%                          |      | 61%                     |      |
| <b>Mediator:</b>                          |                           |      |                        |      |                            |      |                              |      |                         |      |
| Women's BMI                               | 20.0                      | 2.89 | 22.7                   | 4.27 | 23.1                       | 3.49 | 22.9                         | 4.14 | 22.1                    | 3.63 |
| <b>Outcomes: Child Nutritional Status</b> |                           |      |                        |      |                            |      |                              |      |                         |      |
| Height for Age Z Score                    | -1.3                      | 1.80 | -1.0                   | 1.48 | -1.4                       | 1.47 | -1.3                         | 1.43 | -1.2                    | 1.61 |
| Weight for Age Z Score                    | -0.9                      | 1.28 | -0.1                   | 1.24 | 0.4                        | 1.27 | -0.2                         | 1.25 | -0.6                    | 1.26 |
| Anemia Status                             | 35%                       |      |                        |      | 49%                        |      | 25%                          |      | 35%                     |      |

<sup>a</sup> Abbreviation: SD- Standard Deviation

Supplemental Figure 1. Diagram of Direct and Indirect Standardized Path Coefficients from Women's Empowerment to Child's Nutritional Status by Country

A. Ethiopia (n=2664)

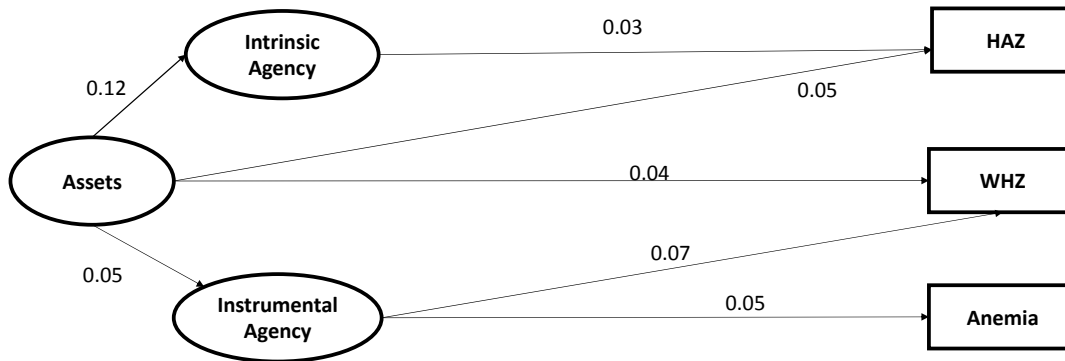

Note:

<sup>a</sup> Model fit statistics: df=78; CFI=0.994; TLI: 0.992; RMSEA: 0.014 (0.011,0.017)

<sup>b</sup> Significant paths based upon 95% confidence intervals

<sup>c</sup> All non-significant paths were dropped for simplicity

<sup>d</sup> Abbreviations: HAZ- Child height-for-age-z score; WHZ- Child weight-for-age-z score

B. Kenya (n=4918)

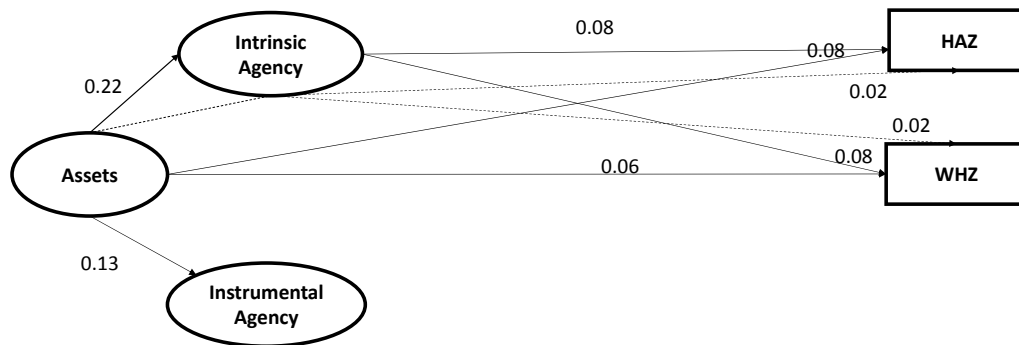

*Note:*

<sup>a</sup> Model fit statistics: df=69; CFI=0.993; TLI: 0.991; RMSEA: 0.016 (0.013,0.019)

<sup>b</sup> Significant paths based upon 95% confidence intervals

<sup>c</sup> All non-significant paths were dropped for simplicity

<sup>d</sup> Abbreviations: HAZ- Child height-for-age-z score; WHZ- Child weight-for-age-z score

C. Rwanda (n=1925) – no significant associations

D. Tanzania (n=2490)

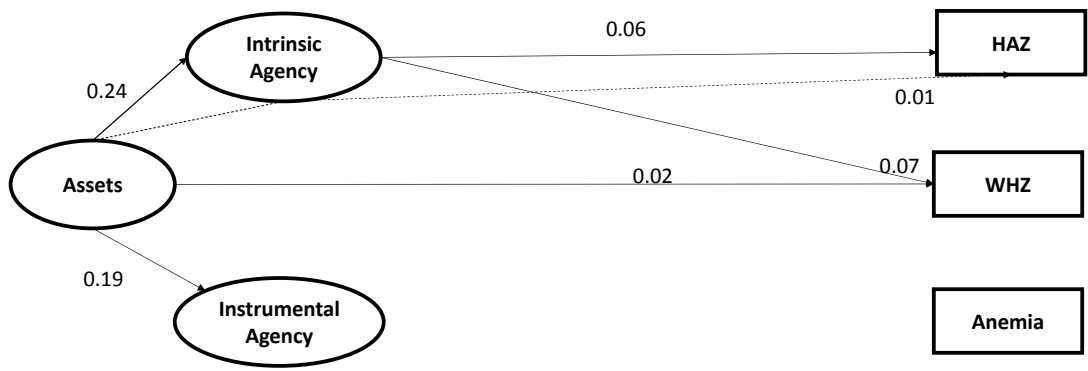

*Note:*

<sup>a</sup> Model fit statistics: df=78; CFI=0.987; TLI: 0.983; RMSEA: 0.025 (0.022,0.027)

<sup>b</sup> Significant paths based upon 95% confidence intervals

<sup>c</sup> All non-significant paths were dropped for simplicity

<sup>d</sup> Abbreviations: HAZ- Child height-for-age-z score; WHZ- Child weight-for-age-z score

E. Uganda (n=1783)

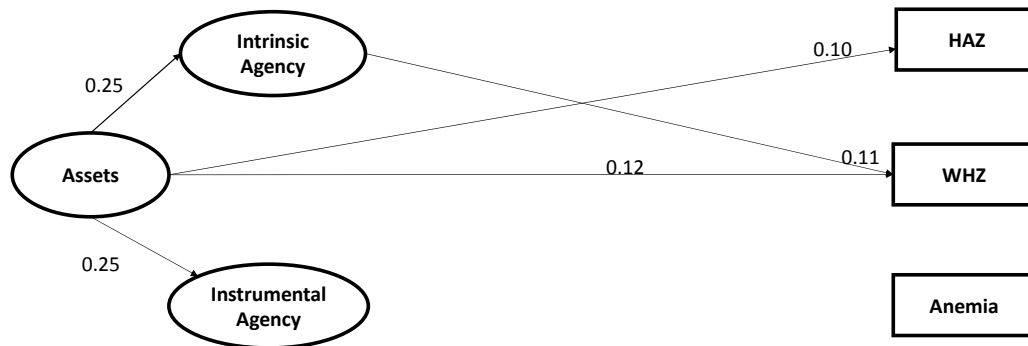

—————> Direct Effects  
 .....> Indirect Effects

*Note:*

<sup>a</sup> Model fit statistics:  $df=78$ ; CFI=0.988; TLI: 0.984; RMSEA: 0.017 (0.008,0.025)

<sup>b</sup> Significant paths based upon 95% confidence intervals

<sup>c</sup> All non-significant paths were dropped for simplicity

<sup>d</sup> Abbreviations: HAZ- Child height-for-age-z score; WHZ- Child weight-for-age-z score

*Supplemental Figure 2. Diagram of Direct and Indirect Standardized Path Coefficients from Women's Empowerment to Child's Nutritional Status Mediated by Women's BMI by Country*

A. Ethiopia (n=2664)

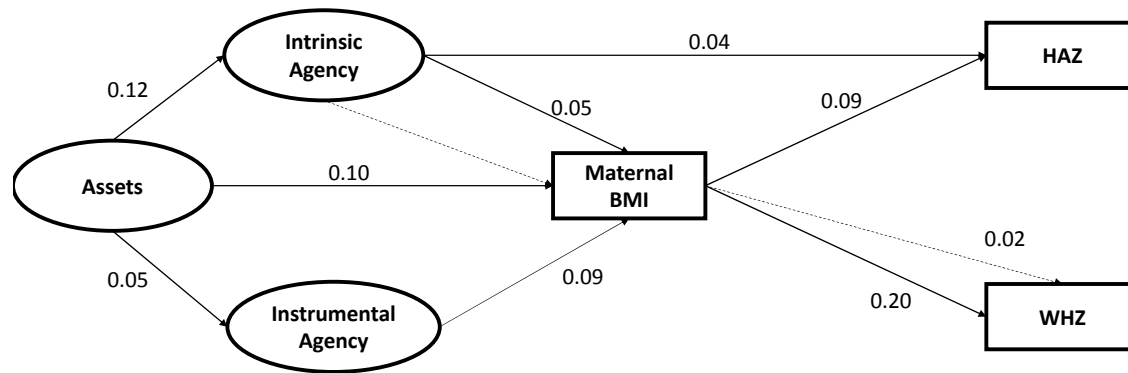

*Note:*

<sup>a</sup> Model fit statistics: df=87; CFI=0.994; TLI: 0.991; RMSEA: 0.014 (0.011,0.017)

<sup>b</sup> Significant paths based upon 95% confidence intervals

<sup>c</sup> All non-significant paths were dropped for simplicity

<sup>d</sup> Abbreviations: BMI- Body Mass Index; HAZ- Child height-for-age-z score; WHZ- Child weight-for-age-z score

B. Kenya (n=4918)



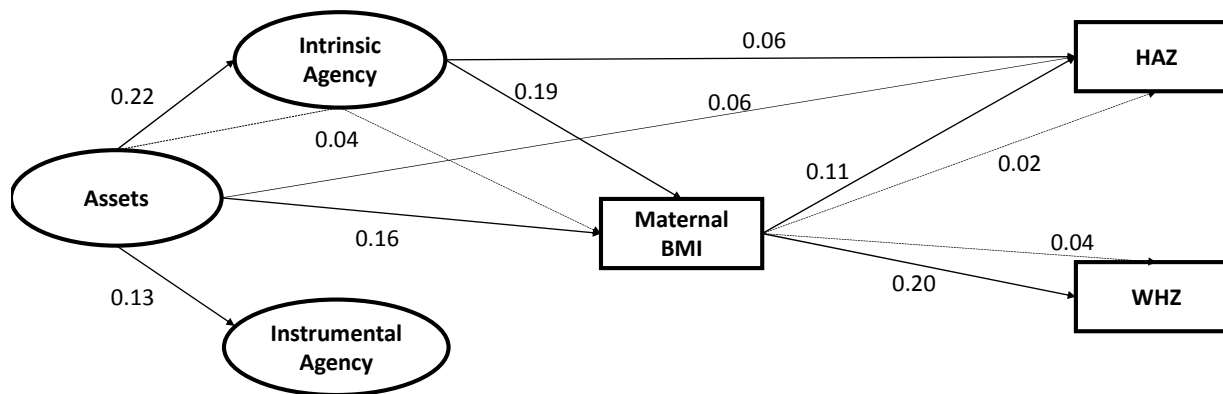

*Note:*

<sup>a</sup> Model fit statistics: df=78; CFI=0.993; TLI: 0.990; RMSEA: 0.016 (0.013,0.019)

<sup>b</sup> Significant paths based upon 95% confidence intervals

<sup>c</sup> All non-significant paths were dropped for simplicity

<sup>d</sup> Abbreviations: BMI- Body Mass Index; HAZ- Child height-for-age-z score; WHZ- Child weight-for-age-z score

C. Rwanda (n=1925)

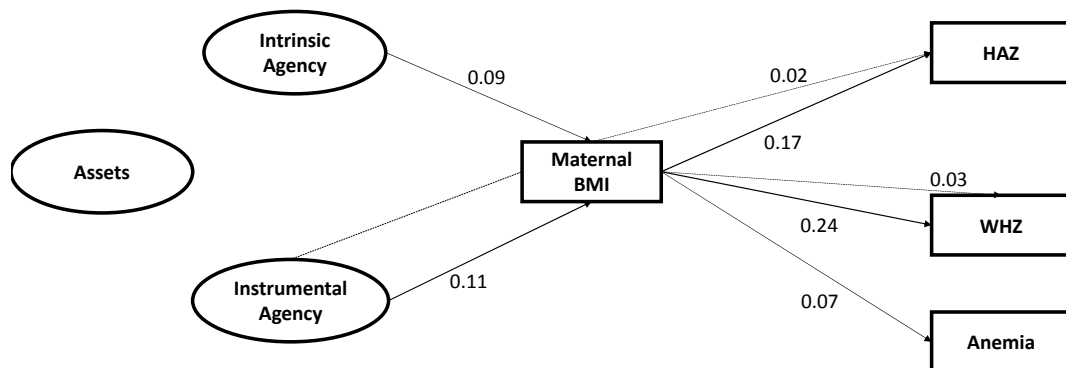

*Note:*

<sup>a</sup> Model fit statistics: df=87; CFI=0.995; TLI: 0.993; RMSEA: 0.013 (0.002,0.020)

<sup>b</sup> Significant paths based upon 95% confidence intervals

<sup>c</sup> All non-significant paths were dropped for simplicity

<sup>d</sup> Abbreviations: BMI- Body Mass Index; HAZ- Child height-for-age-z score; WHZ- Child weight-for-age-z score

D. Tanzania (n=2490)

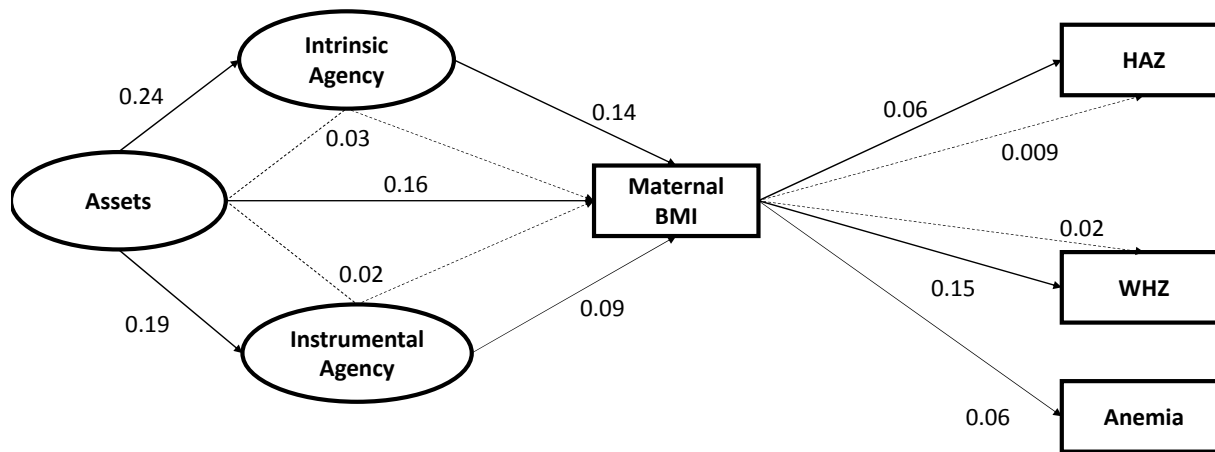

*Note:*

<sup>a</sup> Model fit statistics: df=87; CFI=0.986; TLI: 0.981; RMSEA: 0.024 (0.021,0.027)

<sup>b</sup> Significant paths based upon 95% confidence intervals

<sup>c</sup> All non-significant paths were dropped for simplicity

<sup>d</sup> Abbreviations: BMI- Body Mass Index; HAZ- Child height-for-age-z score; WHZ- Child weight-for-age-z score

E. Uganda (n=1783)

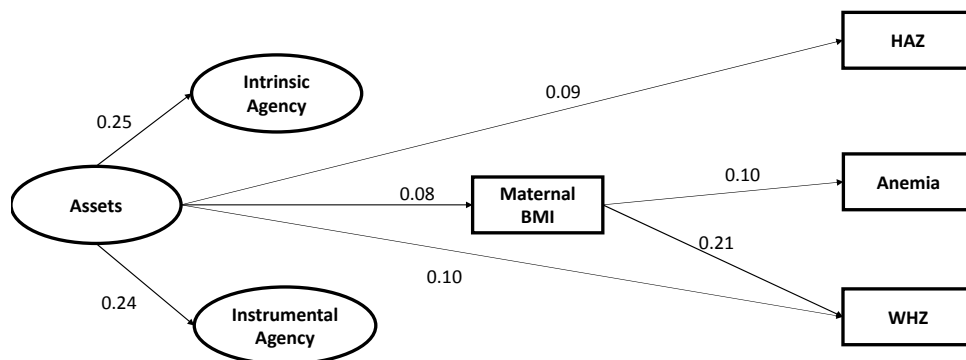

—▶ Direct Effects  
 .....▶ Indirect Effects

*Note:*

<sup>a</sup> Model fit statistics: df=87; CFI=0.987; TLI: 0.982; RMSEA: 0.018 (0.009,0.025)

<sup>b</sup> Significant paths based upon 95% confidence intervals

<sup>c</sup> All non-significant paths were dropped for simplicity

<sup>d</sup> Abbreviations: BMI- Body Mass Index; HAZ- Child height-for-age-z score; WHZ- Child weight-for-age-z score

*Supplemental Figure 3. Diagram of Direct and Indirect Standardized Path Coefficients from Women’s Empowerment to Child’s Nutritional Status Mediated by Women’s BMI by Wealth Groups and by Country*

A. Ethiopia (n=2664)

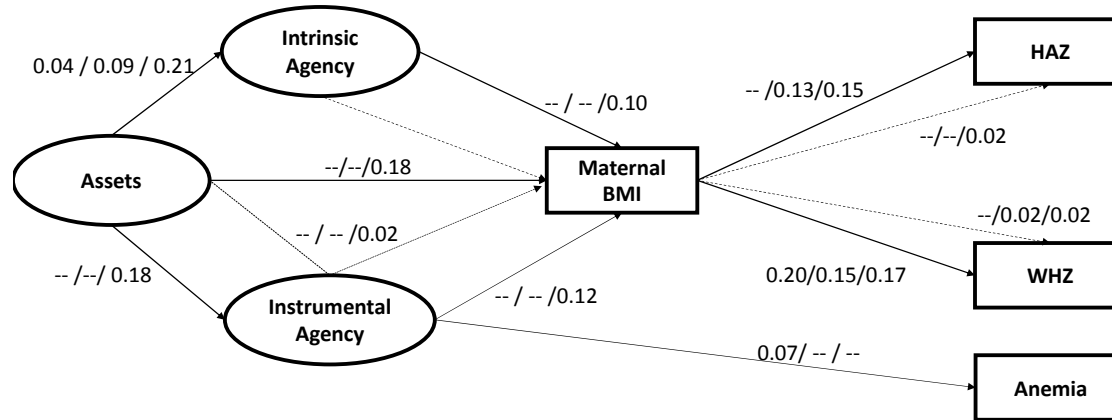

*Note:*

<sup>a</sup> Model fit statistics: df=285; CFI=0.988; TLI: 0.985; RMSEA: 0.003 (0.027,0.032)

<sup>b</sup> Low / Middle / High Wealth Group

<sup>c</sup> Significant paths based upon 95% confidence intervals

<sup>d</sup> All non-significant paths were dropped for simplicity

<sup>e</sup> Abbreviations: BMI- Body Mass Index; HAZ- Child height-for-age-z score; WHZ- Child weight-for-age-z score

B. Kenya (n=4918)

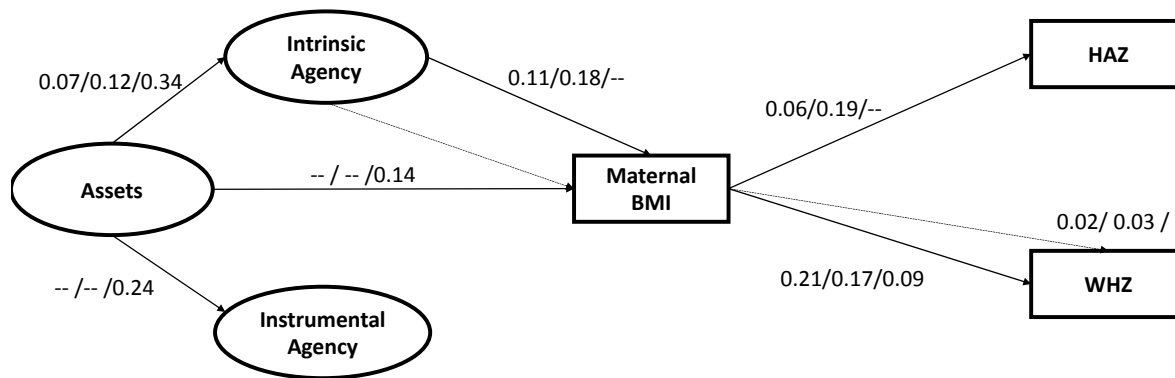

*Note:*

<sup>a</sup> Model fit statistics: df=258; CFI=0.972; TLI: 0.966; RMSEA: 0.030 (0.028,0.033)

<sup>b</sup> Low / Middle / High Wealth Group

<sup>c</sup> Significant paths based upon 95% confidence intervals

<sup>d</sup> All non-significant paths were dropped for simplicity

<sup>d</sup> Abbreviations: BMI- Body Mass Index; HAZ- Child height-for-age-z score; WHZ- Child weight-for-age-z score

C. Rwanda (n=1925)

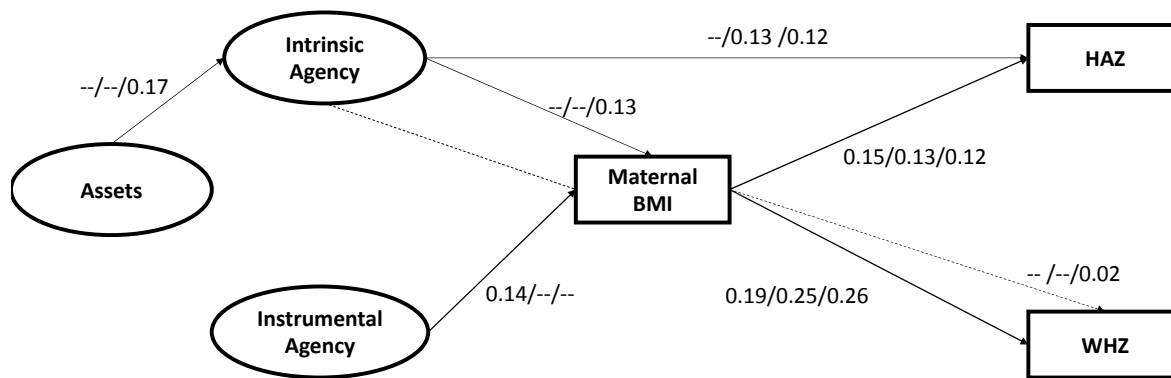

*Note:*

<sup>a</sup> Model fit statistics:  $df=285$ ;  $CFI=0.970$ ;  $TLI: 0.962$ ;  $RMSEA: 0.044 (0.039,0.050)$

<sup>b</sup> Low / Middle / High Wealth Group

<sup>c</sup> Significant paths based upon 95% confidence intervals

<sup>d</sup> All non-significant paths were dropped for simplicity

<sup>e</sup> Abbreviations: BMI- Body Mass Index; HAZ- Child height-for-age-z score; WHZ- Child weight-for-age-z score

D. Tanzania (n=2490)

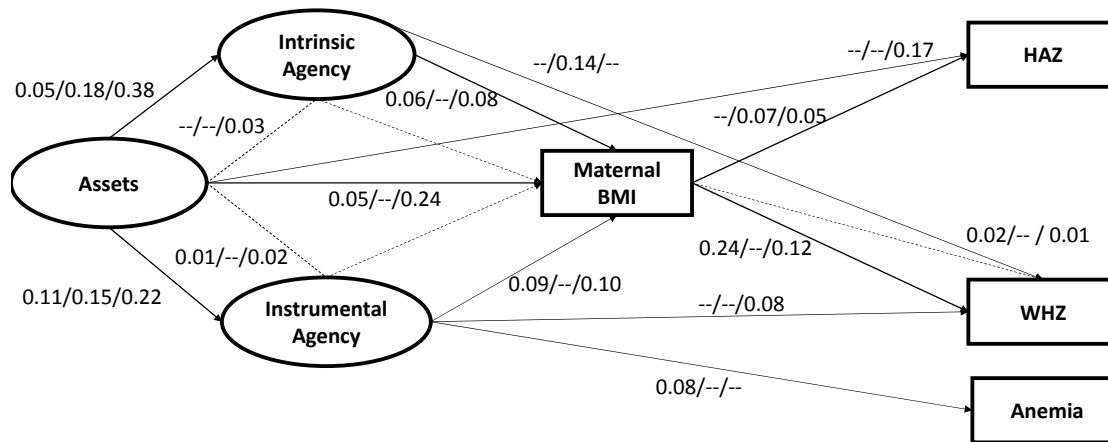

Note:

<sup>a</sup> Model fit statistics: df=285; CFI=0.967; TLI: 0.958; RMSEA: 0.057 (0.054,0.059)

<sup>b</sup> Low / Middle / High Wealth Group

<sup>c</sup> Significant paths based upon 95% confidence intervals

<sup>d</sup> All non-significant paths were dropped for simplicity

<sup>e</sup> Abbreviations: BMI- Body Mass Index; HAZ- Child height-for-age-z score; WHZ- Child weight-for-age-z score

E. Uganda (n=1783)



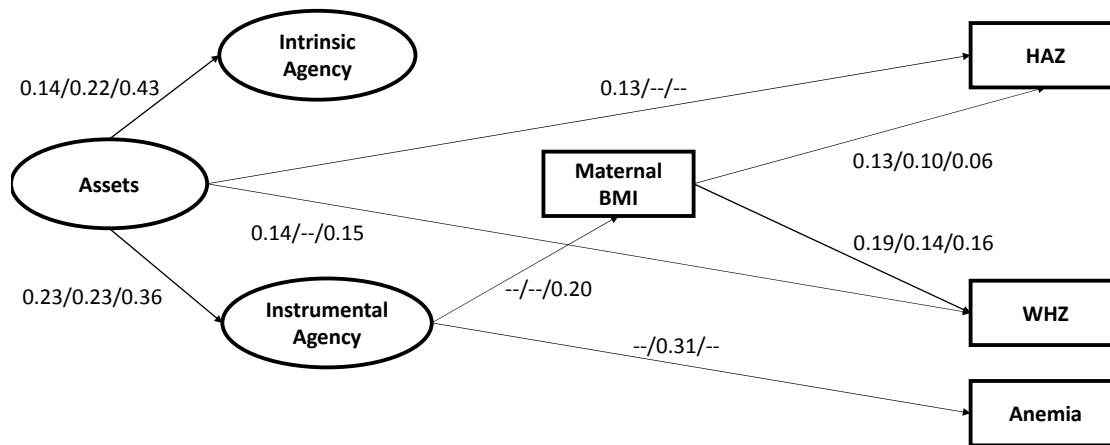

→ Direct Effects  
 ..... Indirect Effects

Note:

<sup>a</sup> Model fit statistics: df=285; CFI=0.941; TLI: 0.925; RMSEA: 0.054 (0.048,0.060)

<sup>b</sup> Low / Middle / High Wealth Group

<sup>c</sup> Significant paths based upon 95% confidence intervals

<sup>d</sup> All non-significant paths were dropped for simplicity

<sup>e</sup> Abbreviations: BMI- Body Mass Index; HAZ- Child height-for-age-z score; WHZ- Child weight-for-age-z score

Supplemental Figure 4. Diagram of Direct and Indirect Standardized Path Coefficients from Women’s Empowerment to Child’s Nutritional Status Mediated by Women’s BMI by Wealth Groups Excluding Rwanda

A. Low

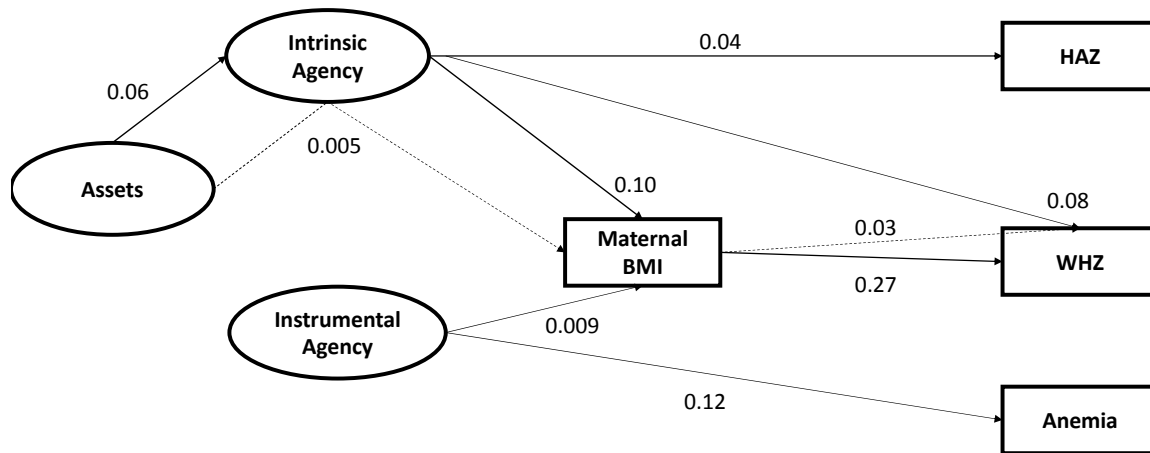

B. Middle

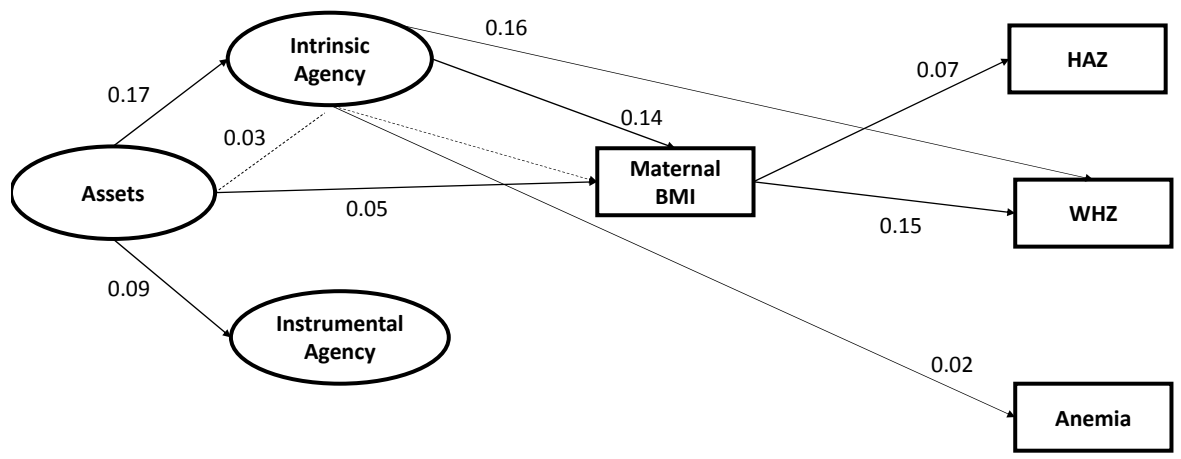

C. High

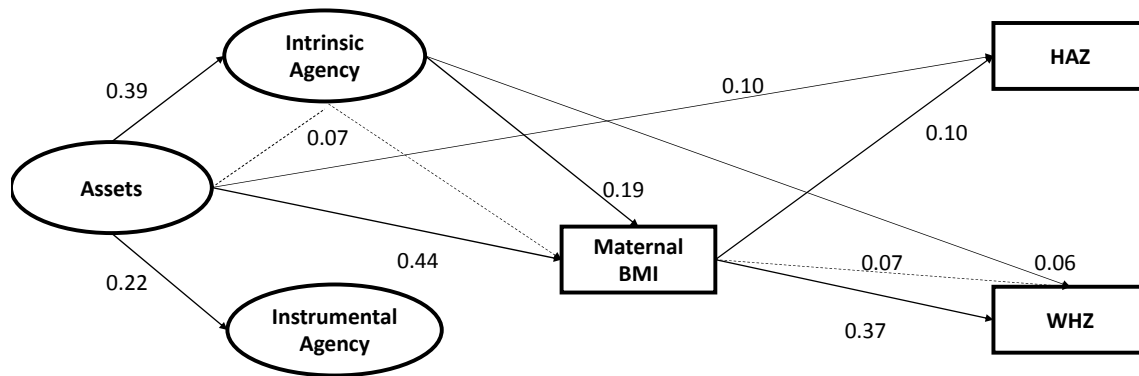

———→ Direct Effects  
 .....→ Indirect Effects

*Note:*

<sup>a</sup> Model fit statistics:  $df=285$ ;  $CFI=0.989$ ;  $TLI: 0.986$ ;  $RMSEA: 0.001 (0.008,0.012)$

<sup>b</sup> Significant paths based upon 95% confidence intervals

<sup>c</sup> All non-significant paths were dropped for simplicity

<sup>d</sup> Abbreviations: BMI- Body Mass Index; HAZ- Child height-for-age-z score; WHZ- Child weight-for-age-z score
